# Supplementary material for: Circulating HLA-DR+CD4+ effector memory T cells resistant to CCR5 and PD-L1 mediated suppression compromise regulatory T cell function in tuberculosis
Source: PubMed Central journal article supplement (PMC6166982; doi:10.1371/journal.ppat.1007289), 2018-09-19

(A) IGRA-ve IGRA+ve PTB ATT (B)

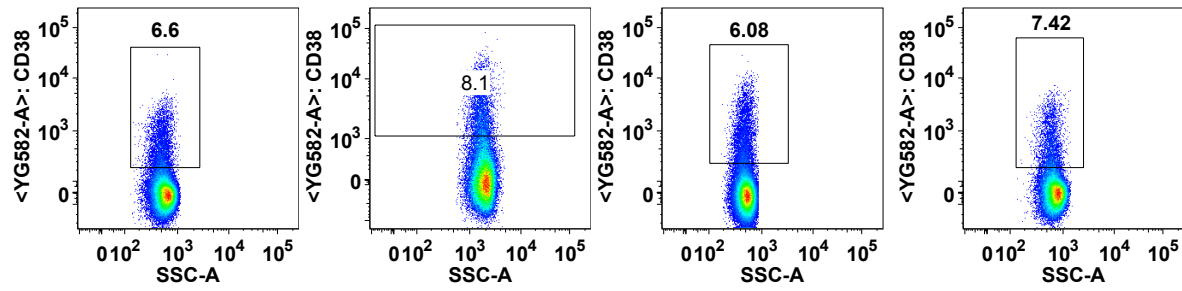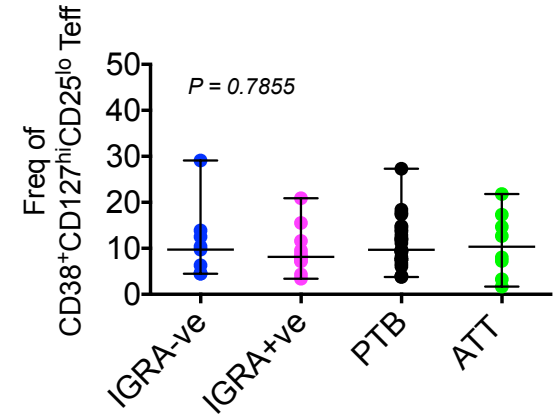

(C) IGRA-ve IGRA+ve PTB ATT (D)

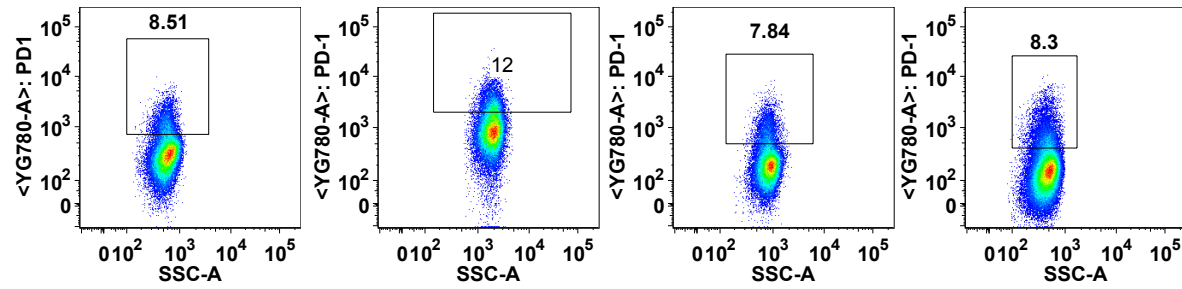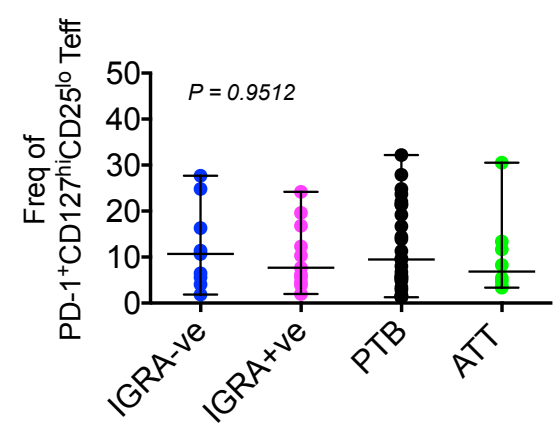

Supplement: ppat.1007289.s004.pdf [file ppat.1007289.s004.pdf]
