# Supplementary material for: Circulating HLA-DR+CD4+ effector memory T cells resistant to CCR5 and PD-L1 mediated suppression compromise regulatory T cell function in tuberculosis
Source: PubMed Central journal article supplement (PMC6166982; doi:10.1371/journal.ppat.1007289), 2018-09-19

(A)

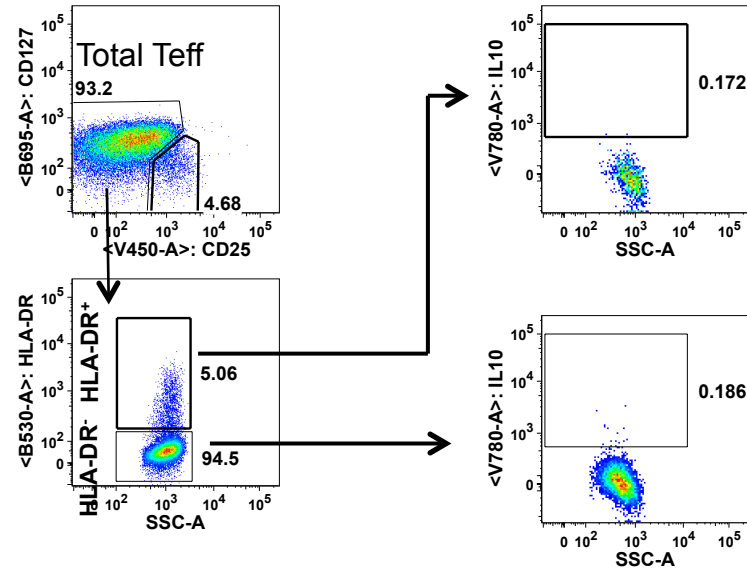

(B)

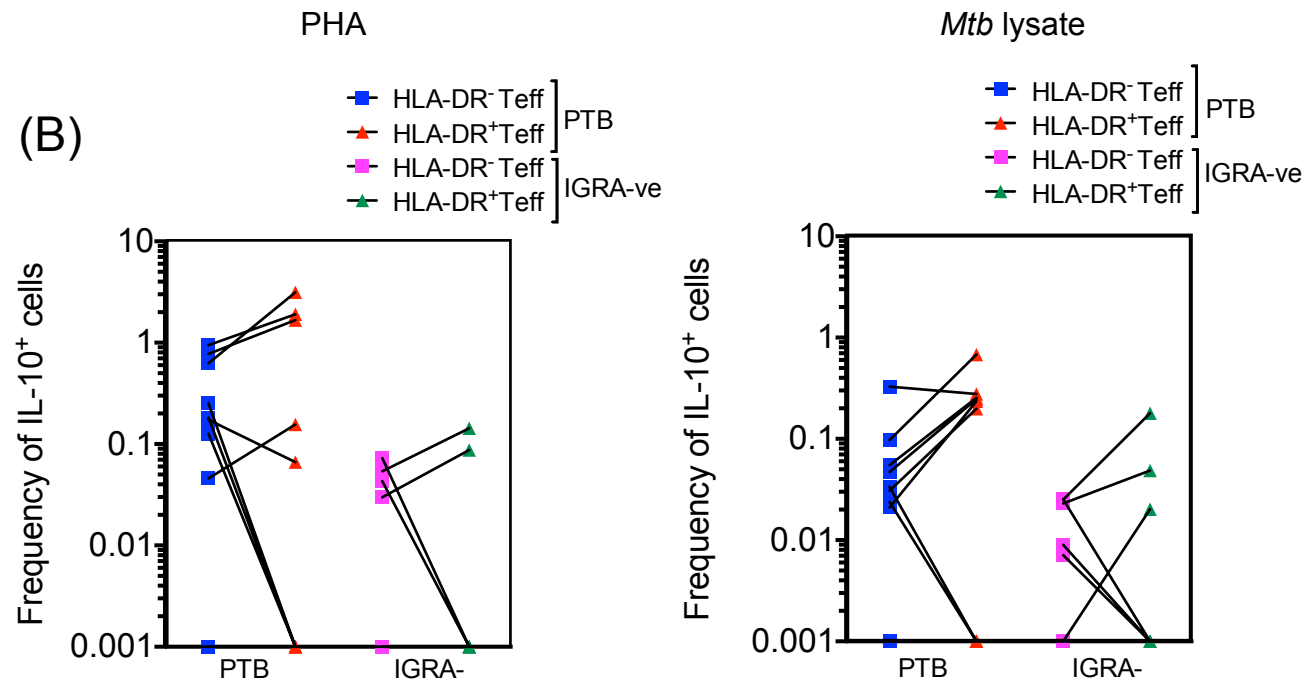

Supplement: ppat.1007289.s009.pdf [file ppat.1007289.s009.pdf]
