# Supplementary material for: Circulating HLA-DR+CD4+ effector memory T cells resistant to CCR5 and PD-L1 mediated suppression compromise regulatory T cell function in tuberculosis
Source: PubMed Central journal article supplement (PMC6166982; doi:10.1371/journal.ppat.1007289), 2018-09-19
Supplement: ppat.1007289.s012.pdf [file ppat.1007289.s012.pdf]

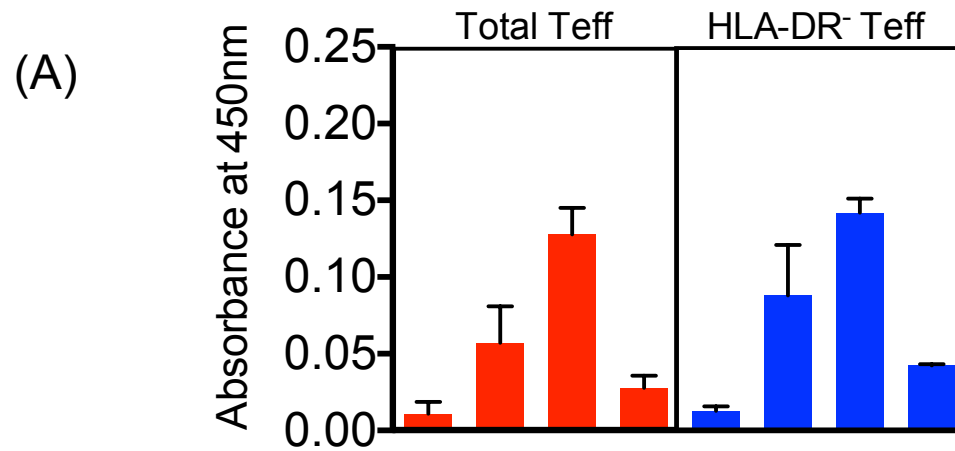

|                    |   |   |   |   |   |   |   |   |
|--------------------|---|---|---|---|---|---|---|---|
| CCL3 + CCL4        | - | + | - | - | - | + | - | - |
| anti-CCR5          | - | - | - | + | - | - | - | + |
| anti-CD3/anti-CD28 | - | - | + | + | - | - | + | + |

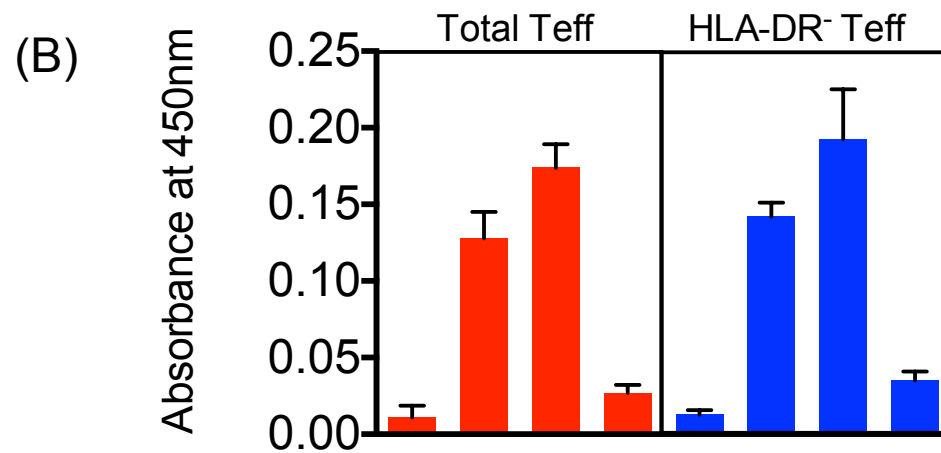

|                    |   |   |   |   |   |   |   |   |
|--------------------|---|---|---|---|---|---|---|---|
| anti-CD3/anti-CD28 | - | + | + | + | - | + | + | + |
| anti-PD-L1         | - | - | + | - | - | - | + | - |
| recombinant PD-L1  | - | - | - | + | - | - | - | + |
